# Supplementary material for: A Systems Approach Identifies Essential FOXO3 Functions at Key Steps of Terminal Erythropoiesis
Source: PubMed Central journal article supplement (PMC4599908; doi:10.1371/journal.pgen.1005526), 2015-10-09

# Figure S2

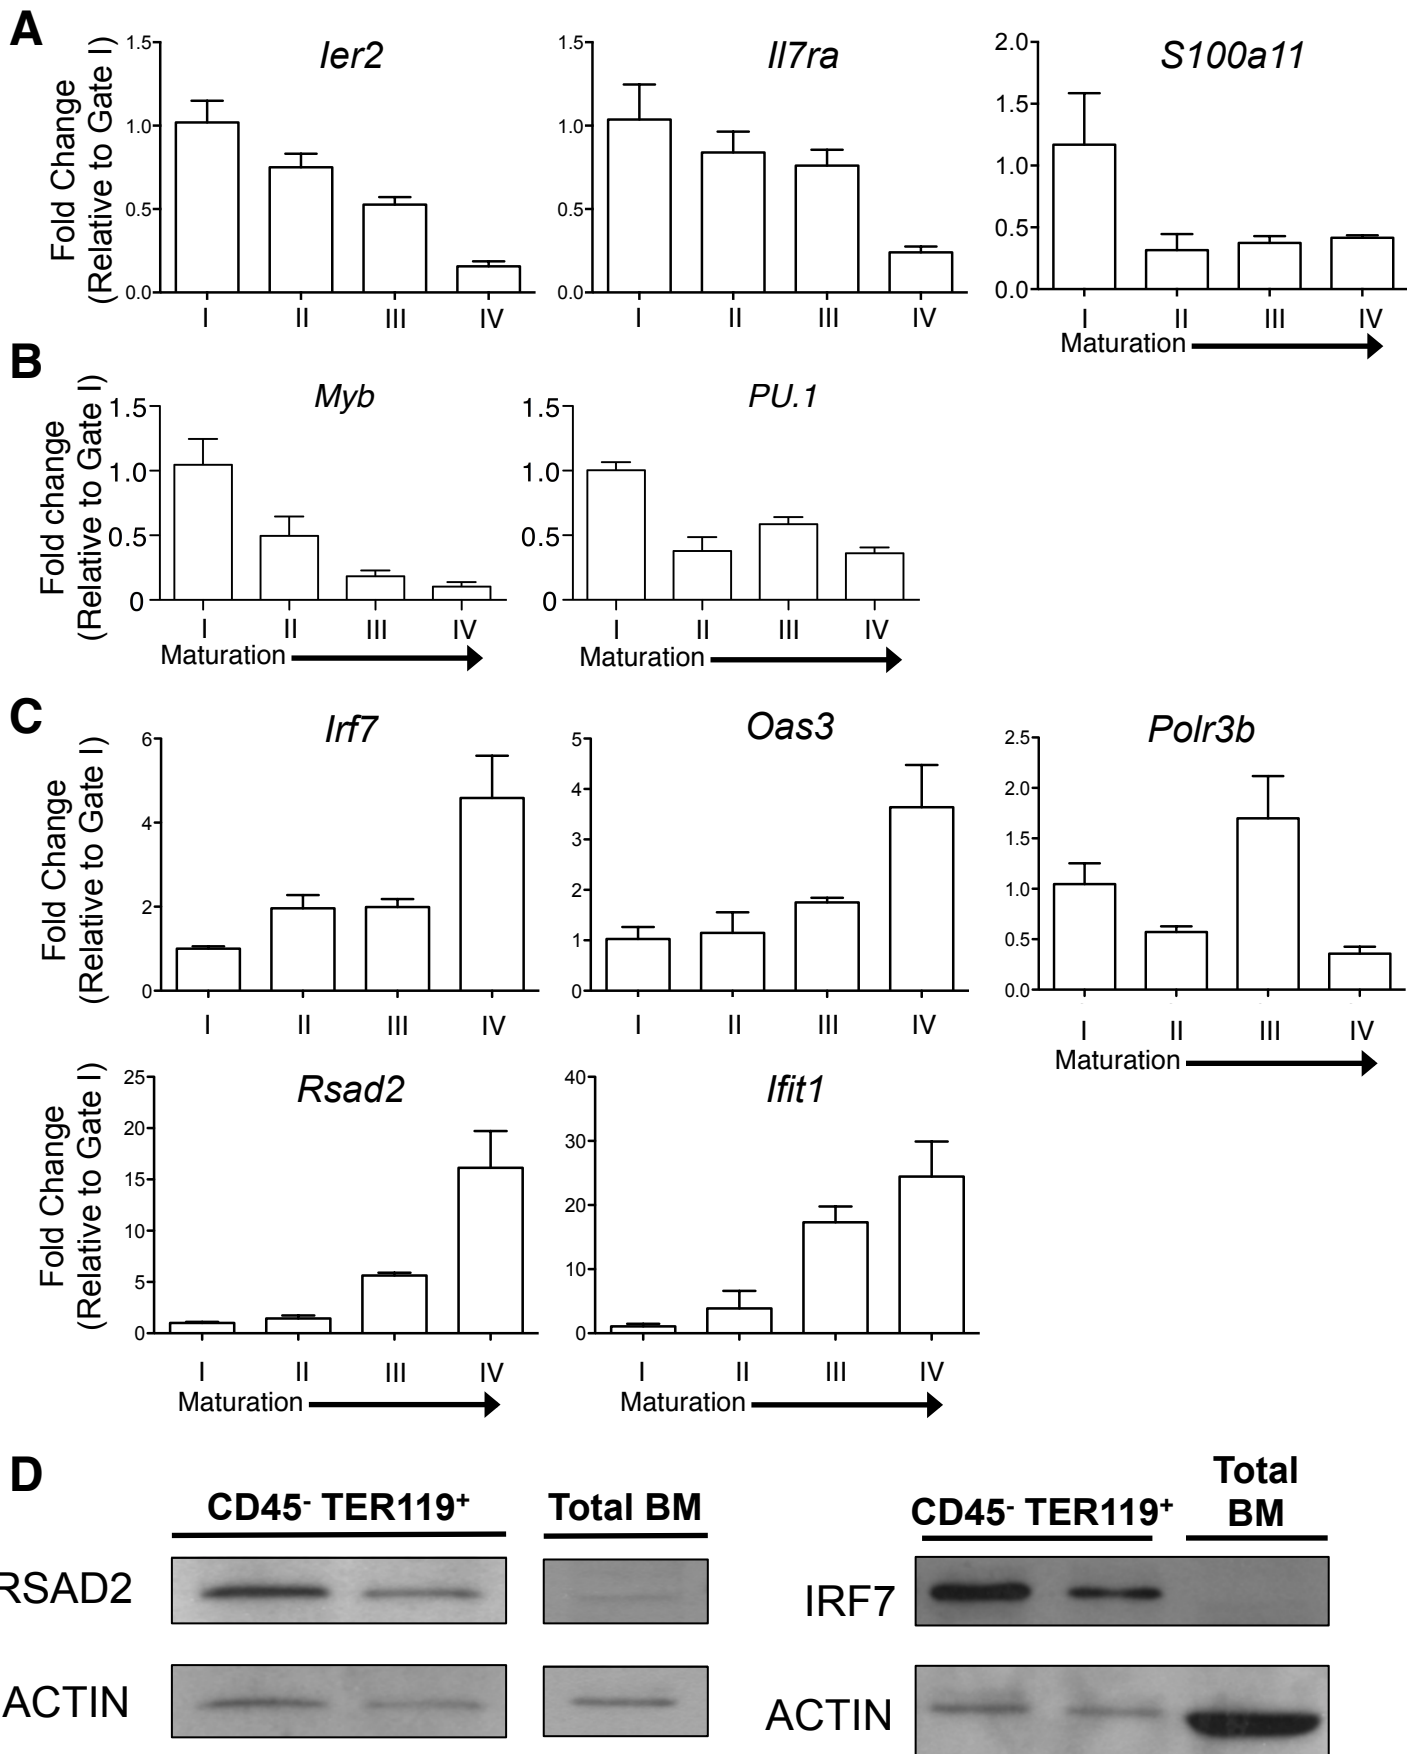

Supplement: pgen.1005526.s002.pdf [file pgen.1005526.s002.pdf]
