# Supplementary material for: A Systems Approach Identifies Essential FOXO3 Functions at Key Steps of Terminal Erythropoiesis
Source: PubMed Central journal article supplement (PMC4599908; doi:10.1371/journal.pgen.1005526), 2015-10-09

**Figure S3****A**

|                                                      | Gate I | Gate II | Gate III |
|------------------------------------------------------|--------|---------|----------|
| Foxo3 expression (FPKM)                              | 78.1   | 102.6   | 156.5    |
| Differences between WT & <i>Foxo3</i> <sup>-/-</sup> | 1147   | 1010    | 3074     |

**B**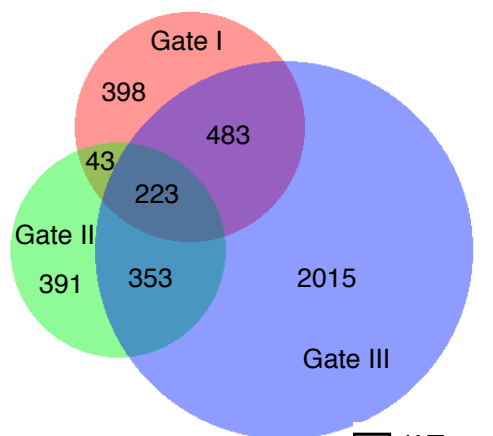**C**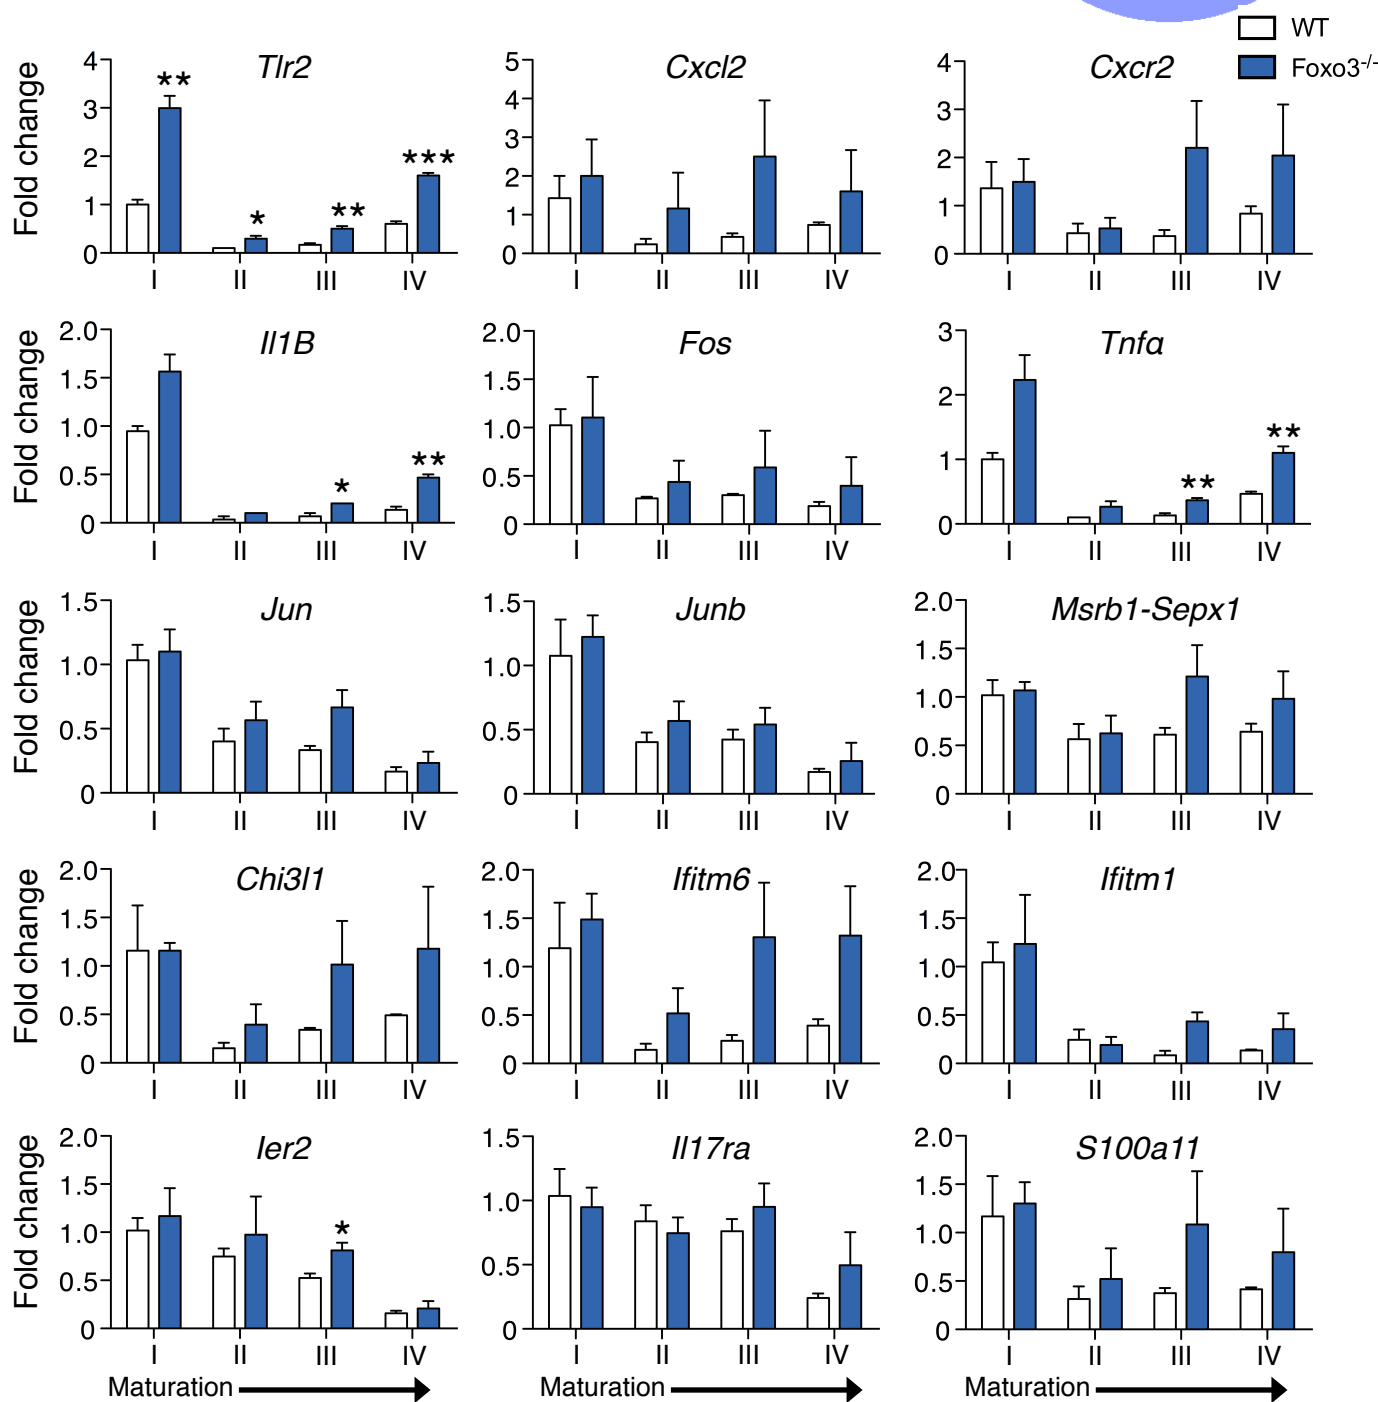

Supplement: pgen.1005526.s003.pdf [file pgen.1005526.s003.pdf]
