# Supplementary material for: A Systems Approach Identifies Essential FOXO3 Functions at Key Steps of Terminal Erythropoiesis
Source: PubMed Central journal article supplement (PMC4599908; doi:10.1371/journal.pgen.1005526), 2015-10-09

# Figure S4

## A

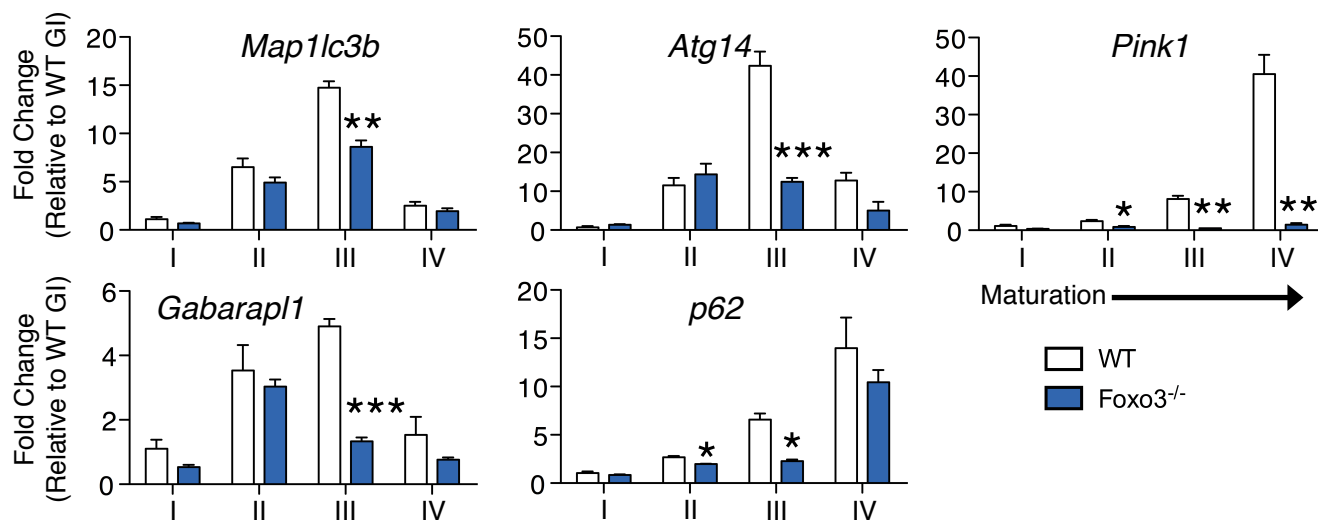

## B

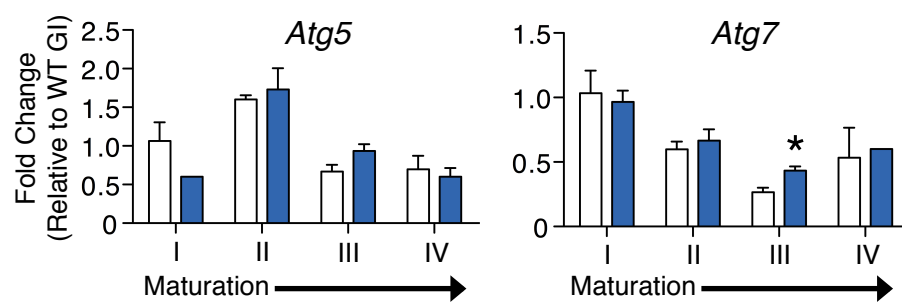

## C

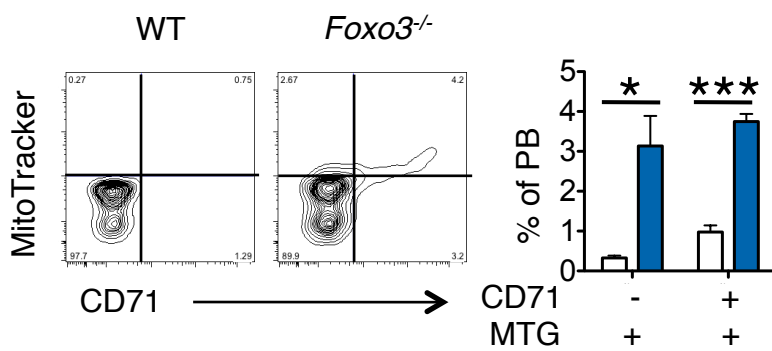

Supplement: pgen.1005526.s004.pdf [file pgen.1005526.s004.pdf]
