# Supplementary material for: A Systems Approach Identifies Essential FOXO3 Functions at Key Steps of Terminal Erythropoiesis
Source: PubMed Central journal article supplement (PMC4599908; doi:10.1371/journal.pgen.1005526), 2015-10-09
Supplement: pgen.1005526.s008.pdf [file pgen.1005526.s008.pdf]

# Figure S8

**A.**

FOXO3 targets  
(DLD1 Cells)      Clusters R,Q  
(Primary Erythroblasts)

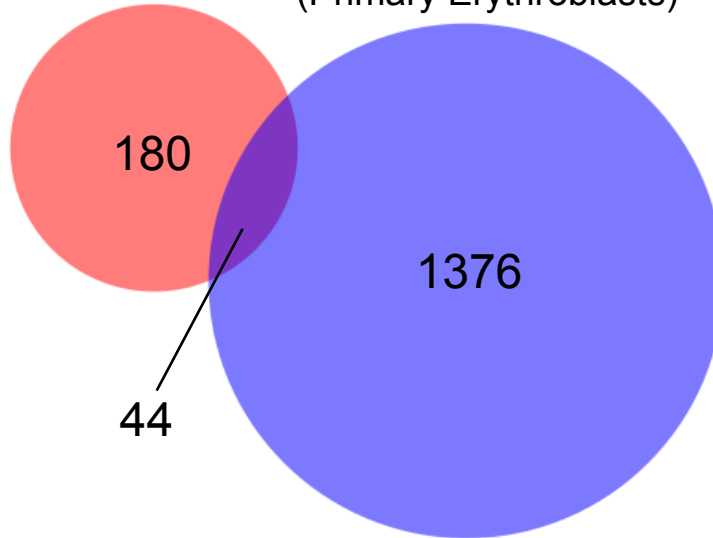

| Chi-Squared          | Observed | Expected |
|----------------------|----------|----------|
| ChIPseq - Overlap    | 44       | 14       |
| ChIPseq - No Overlap | 180      | 210      |
